# Supplementary material for: Cryopreserving Rabbit Semen: Impact of Varying Sperm Concentrations on Quality and the Standardization of Protocol
Source: MDPI journal article supplement (doi:10.3390/vetsci11010009), 2023-12-22
Supplement: s1 [file s1]

Supplementary materials

Table S1. Fresh sperm quality outcomes in different rabbit semen pools.

| Fresh semen pool | Sperm variables                                 |        |        |              |              |              |         |         |         |          |          |         |
|------------------|-------------------------------------------------|--------|--------|--------------|--------------|--------------|---------|---------|---------|----------|----------|---------|
|                  | Sperm concentration (spz × 10 <sup>6</sup> /mL) | TM (%) | PM (%) | VCL (µm/sec) | VAP (µm/sec) | VSL (µm/sec) | STR (%) | LIN (%) | WOB (%) | ALH (µm) | BCF (Hz) | SMI (%) |
| 1                | 765                                             | 95.1   | 68.8   | 73.9         | 39.5         | 23.1         | 57.5    | 32.2    | 53.8    | 3.3      | 6.9      | 85.7    |
| 2                | 655                                             | 95.2   | 67.3   | 73.3         | 39.9         | 26.2         | 59.7    | 34.0    | 53.4    | 3.3      | 6.8      | 94.1    |
| 3                | 639                                             | 89.6   | 68.9   | 75.5         | 43.9         | 32.3         | 68.3    | 41.8    | 58.1    | 3.1      | 8.4      | 89.7    |
| 4                | 1,105                                           | 92.9   | 76.5   | 87.1         | 40.1         | 26.1         | 62.3    | 30.4    | 47.4    | 4.1      | 8.3      | 92.5    |
| 5                | 672                                             | 92.3   | 70.6   | 76.9         | 42.8         | 29.0         | 64.2    | 37.6    | 55.6    | 3.4      | 7.7      | 92.5    |
| 6                | 746                                             | 88.2   | 65.5   | 75.2         | 40.1         | 24.6         | 59.7    | 33.5    | 53.7    | 3.4      | 7.6      | 88.0    |
| 7                | 628                                             | 89.5   | 66.5   | 70.8         | 35.6         | 21.2         | 57.2    | 29.3    | 49.8    | 3.3      | 7.1      | 90.4    |
| 8                | 650                                             | 91.1   | 61.9   | 66.2         | 37.6         | 24.4         | 60.5    | 36.4    | 56.9    | 3.0      | 7.1      | 90.2    |
| Mean             | 732.5                                           | 91.7   | 68.2   | 74.9         | 39.9         | 25.9         | 61.2    | 34.4    | 53.6    | 3.4      | 7.5      | 90.4    |
| S.D.             | 158.6                                           | 2.6    | 4.2    | 6.0          | 2.6          | 3.5          | 3.7     | 4.1     | 3.5     | 0.3      | 0.6      | 2.7     |

TM (%), total motility; PM (%) progressive motility; VCL (µm/sec), curvilinear velocity; VAP (µm/sec), average path velocity; VSL (µm/sec), straight-line velocity; STR (%) (VSL/VAP × 100), straightness; LIN (%) (VSL/VCL × 100), linearity; WOB (%) (VAP/VCL × 100), wobble; ALH (µm), amplitude of lateral head displacement; BCF (Hz), beat cross frequency; SMI (%) sperm membrane integrity.
